1                   **Continued circulation, recombination and evolution of the ancient**  
2                   **subcontinent lineage despite predominance of the recent arctic-like lineage**  
3                   **rabies viruses (RABV) in India**

4  
5  
6                   Jagadeeswaran Deventhiran<sup>1\*</sup>, Bhuvanewari Srinivasan<sup>2</sup>, Manoharan Seeralan<sup>2</sup>, Vijayarani  
7                   Kanagaraj<sup>2</sup>, Sangeetha Raju<sup>1</sup>, Kumanan Kathaperumal<sup>2</sup>, Ruth Nissly<sup>3</sup>, Sunitha Manjari  
8                   Kasibhatla<sup>4,5</sup>, Mohan M Kale<sup>6</sup>, Urmila Kulkarni-Kale<sup>4</sup> and Suresh V Kuchipudi<sup>3#</sup>  
9

10                   <sup>1</sup>*Center for Molecular Medicine and Infectious Diseases, Department of Biomedical Sciences*  
11                   *and Pathobiology, College of Veterinary Medicine, Virginia Tech, Blacksburg, VA, United States*

12                   <sup>2</sup>*Department of Animal Biotechnology, Madras Veterinary College, Tamil Nadu Veterinary and*  
13                   *Animal Sciences University, Chennai, India.*

14                   <sup>3</sup>*Animal Diagnostic Laboratory, Department of Veterinary and Biomedical Sciences, The*  
15                   *Pennsylvania State University, University Park, USA*

16                   <sup>4</sup>*Bioinformatics Center, Savitribai Phule Pune University, Pune 411 007, India*

17                   <sup>5</sup>*HPC-Medical & Bioinformatics Group, Centre for Development of Advanced Computing, SP*  
18                   *Pune University Campus, Pune 411007, India*

19                   <sup>6</sup> *Department of Statistics, Savitribai Phule Pune University, Pune 411 007, India*

20  
21                   **Short title:** Evolution of dog rabies viruses in India

22                   # Correspondence to [skuchipudi@psu.edu](mailto:skuchipudi@psu.edu); Tel: + 814-863-5737

23                   \* Present Address: Department of Chemical and Biological Engineering, University of  
24                   Wisconsin, Madison.  
25  
26

28 **Abstract**

29 **Background**

30 Rabies is an emerging and re-emerging lethal encephalitis causing 26,400 to 61,000 human  
31 deaths annually. Approximately 20,000 people die of rabies every year in India that accounts to  
32 36% of the world's rabies deaths. Rabies is endemic among domestic dogs in India and there are  
33 conflicting reports on the currently circulating RABV lineages in domestic dogs in India.  
34 Further, movement of humans and animals between Sri Lanka and southern coastal states of  
35 India was proposed to be a source of the emergence of variant RABV in India. For effective  
36 prevention and control of rabies in India it is essential to establish the genetic diversity and  
37 evolutionary dynamics of RBAV currently circulating in India.

38 **Methods:** We carried out molecular evolution and recombination analyses of nucleoprotein (N)  
39 and glycoprotein (G) genes of 26 RABV isolates from southern Indian states of Tamil Nadu and  
40 Goa.

41 **Results:**

42 We found continued co-circulation of ancient subcontinent lineage despite predominance of the  
43 recent arctic-like lineage RABVs in southern India. The mean rate of nucleotide substitution in G  
44 and N genes was  $1.32 \times 10^{-3}$  and  $1.91 \times 10^{-4}$  substitutions/site/yr respectively. The study also found  
45 recombination in both N and G genes and a higher mean rate of evolutionary changes in G gene  
46 among Indian dog RABV isolates than those of lyssaviruses. The Indian subcontinent lineage  
47 RABV isolates investigated in this study clustered closely with other subcontinent lineage viruses  
48 from Sri Lanka highlighting the continued incursion and/or circulation of the variant subcontinent  
49 lineages of RABVs between India and Sri Lanka.

50 **Conclusion**

51 We report that there is enzootic viral establishment of two distinct RABV lineages in domestic  
52 dogs in India that are evolving at a greater rate.

53 **Keywords:** Rabies viruses, evolution, recombination, Arctic like lineage, Subcontinent lineage,  
54 India

55 **Author summary:** Rabies is a fatal viral disease that has no treatment and can only be prevented  
56 by post-exposure vaccination. In many parts of Asia and Africa, rabies continues to be a major  
57 public health threat almost always caused by dog bites. In this study, we investigated the genetic  
58 diversity and rate of evolution among rabies viruses isolated from dogs in India. We found that  
59 two distinct lineages of Rabies viruses (RABVs) namely the ancient subcontinent lineage and a  
60 more recent arctic-like lineage co-circulate among dogs in India. Notably, our study found that  
61 the dog rabies viruses in India are undergoing recombination and evolving at a higher rate than  
62 other lyssaviruses. Phylogenetic analysis revealed continued incursion and/or circulation of the  
63 variant subcontinent lineages of RABVs in India that might have been originated from Sri  
64 Lanka. Our study indicates that two distinct lineages of RABVs are maintained and currently  
65 circulate among dog population in India

66

## 67 **Introduction**

68 Rabies is one of the longest known human diseases and was first documented at least 4,000  
69 years ago [1-3]. Rabies is among the key neglected tropical diseases (NTDs) that predominantly  
70 affects poor and vulnerable populations. According to World Health Organization (WHO)  
71 estimates in 2010, the annual number of human deaths due to rabies globally ranges between  
72 26,400 to 61,000 with the vast majority of deaths (84%) occurring in rural areas [4].

73 Rabies is caused by Rabies virus (RABV), which belongs to the genus *Lyssavirus*, belonging to  
74 the family *Rhabdoviridae* and order Mononegavirales [5]. RABV virions are enveloped, rod- or  
75 bullet-shaped, with single stranded negative sense RNA genomes measuring approximately 12  
76 kb. Among the 12-identified species within the genus *Lyssavirus*, RABV has the broadest  
77 geographic distribution and the widest spectrum of vectors or reservoir hosts within the orders  
78 Carnivora and Chiroptera [6-8]. RABV is the main etiological agent of rabies, an acute and

79 almost invariably fatal form of encephalomyelitis, which can affect almost all terrestrial  
80 mammals, including humans. Contamination with infected saliva by bite, scratch or mucous  
81 membrane exposure constitutes an important source of infection. Despite the availability of an  
82 effective post-exposure prophylaxis, it is estimated that approximately 55,000 people die every  
83 year due to rabies, with more than 95% of human deaths occurring in Asia and Africa [9].  
84 According to 2011 WHO estimates, 1.74 million disability-adjusted life years are lost each year  
85 due to rabies and estimated annual cost burden is US\$ 583.5 million. Though rabies can be  
86 prevented by vaccination, there is no effective treatment after the onset of the clinical disease [6].

87 The domestic dog remains the main reservoir and vector of rabies in developing countries and is  
88 responsible for almost all human deaths. Dogs have been identified as the main vector involved  
89 in interspecies RABV transmission. Various wild carnivores are involved in the maintenance of  
90 RABV and transmission of sylvatic rabies in limited geographic regions, with a small  
91 contribution in the burden of human rabies. Other terrestrial mammal species including livestock  
92 species are susceptible to rabies but act as epidemiological dead-end hosts as they do not  
93 transmit the disease further [10]. Multiple lineages of dog RABVs have been described that  
94 include African, Asian, Arctic-like, Cosmopolitan and Indian subcontinent [3]

95 Rabies continues to be major public health threat in India. A national rabies survey in India in  
96 2006 sponsored by the WHO reported that 20,000 persons died of rabies each year [11].  
97 Molecular epidemiology of RABV isolates in India based on nucleoprotein (N) and  
98 phosphoprotein (P) genes found that all the Indian RABV isolates clustered within a single  
99 clade corresponding to Arctic/Arctic-like viruses [12]. Using the ecto-domain coding region of  
100 the glycoprotein gene sequence, a study later found co-existence of both Arctic like 1 lineage and

101 Indian subcontinent lineage RABV in India [13]. However, a more recent study reported that  
102 based on G gene sequence, all the Indian isolates obtained between 2001-2014 from six different  
103 species of animals were genetically related to Arctic-like 1a lineage viruses [14]. Indian RABV  
104 isolates clustered within the Arctic/Arctic-like clade are well separated in evolutionary terms  
105 from the Cosmopolitan lineage as well as other lineages that circulate in various parts of  
106 Southeast Asia [15]. Most of the RABV molecular epidemiological studies carried out in India  
107 were done with isolates collected over a long period of time and from multiple geographical  
108 locations in India. To design better prevention and control strategies, it is important to investigate  
109 the genetic diversity and evolutionary dynamics of RABV lineages.

110 Molecular epidemiologic approaches are very helpful to track the spread of RABV variants and  
111 identify their incursion into new geographic regions [16]. Further, molecular epidemiological  
112 analyses of RABVs in Rabies endemic countries such as India would allow accurate analysis of  
113 the spread and evolution of RABVS to design better control methods [15]. A previous study  
114 found a RABV isolate from the city of Chennai (previously known as Madras) in the  
115 southeastern coast in India clustered more closely to a distinct variant RABV found in Sri Lanka  
116 rather than with the other Indian isolates [15]. Chennai, in the state of Tamil Nadu, is the  
117 southernmost city in India. The movement of humans and their animals between Sri Lanka and  
118 India was proposed to be a source of the emergence of the variant RABV in India [15].

119 Movement of people continues to occur between the southeastern coastal area of India and Sri  
120 Lanka. In order to better understand the genetic divergence of RABV lineages circulating in  
121 India, we carried out molecular evolutionary analyses of RABV isolates collected in 2014 from  
122 southern Indian states of Tamil Nadu and Goa.

123 **Methods:**

124 **Samples and laboratory tests to confirm rabies:**

| S.No | Species | Sample Id | Place   | Genbank accession |          |
|------|---------|-----------|---------|-------------------|----------|
|      |         |           |         | N gene            | G gene   |
| 1    | Dog     | MVC-1     | Goa     | MH258836          | MH258814 |
| 2    | Dog     | MVC-2     | Goa     | MH258835          | MH258813 |
| 3    | Dog     | MVC-3     | Goa     | MH258834          | MH258812 |
| 4    | Dog     | MVC-4     | Goa     | MH258833          | MH258811 |
| 5    | Dog     | MVC-5     | Goa     | MH258832          | MH258810 |
| 6    | Dog     | MVC-8     | Goa     | MH258831          | MH258809 |
| 7    | Dog     | MVC-10    | Chennai | MH258838          | MH258804 |
| 8    | Dog     | MVC-15    | Goa     | MH258830          | MH258808 |
| 9    | Dog     | MVC-19    | Goa     | MH258829          | MH258807 |
| 10   | Dog     | MVC-21    | Goa     | MH258837          | MH258815 |
| 11   | Dog     | MVC-23    | Chennai | MH258839          | MH258803 |
| 12   | Dog     | MVC-29    | Chennai | MH258816          | MH258800 |
| 13   | Dog     | MVC-30    | Chennai | MH258817          | MH258799 |
| 14   | Dog     | MVC-31    | Chennai | MH258818          | MH258798 |

Twenty-six brain samples from animals, which died of rabies symptoms, were used in this study. The samples included twenty-three isolates from domestic dogs, two samples from goats, and one sample from cattle. The

135 samples were collected in 2014 from two different states on the east and west coast of southern  
136 India (Tamil Nadu and Goa) (Table 1). The samples were tested at the rabies unit of Madras  
137 Veterinary College for rabies confirmation by fluorescent antibody test (FAT) [17]. In addition  
138 to FAT, N-gene specific RT-PCR [18] of 20% homogenate of the respective brain samples in  
139 phosphate buffered saline was performed to confirm the presence of rabies viral genomes.  
140 Sample collection from animals was performed in full compliance with the Committee for the  
141 Purpose of Control and Supervision of Experiments on Animals (CPCSEA) regulations and the  
142 study was approved by the Institutional Animal Ethics Committee (IAEC) of Tamil Nadu  
143 Veterinary and Animal Sciences University (TANUVAS), Chennai, India.

|     |    |        |        |         |          |          |
|-----|----|--------|--------|---------|----------|----------|
| 144 | 15 | Dog    | MVC-34 | Chennai | MH258840 | MH258802 |
| 145 | 16 | Dog    | MVC-37 | Chennai | MH258819 | MH258797 |
| 146 | 17 | Dog    | MVC-38 | Chennai | MH258820 | MH258796 |
| 147 | 18 | Dog    | MVC-42 | Chennai | MH258821 | MH258793 |
| 148 | 19 | Goat   | MVC-45 | Chennai | MH258822 | MH258795 |
| 149 | 20 | Dog    | MVC-48 | Goa     | MH258828 | MH258794 |
| 150 | 21 | Cattle | MVC-49 | Chennai | MH258823 | MH258806 |
| 151 | 22 | Dog    | MVC-50 | Chennai | MH258824 | MH258792 |
| 152 | 23 | Dog    | MVC-51 | Goa     | MH258827 | MH258805 |
| 153 | 24 | Goat   | MVC-53 | Chennai | MH258841 | MH258801 |
| 154 | 25 | Dog    | MVC-54 | Chennai | MH258825 | MH258791 |
| 155 | 26 | Dog    | MVC-55 | Chennai | MH258826 | MH258790 |

**Table 1:** List of rabies positive samples and their origin

153

154

155

156

157

158

159

160

161

162

163

164

165

166

167

168

### 169 **RNA extraction and RT-PCR**

170 Total RNA was extracted from the brain tissue homogenates using TRIzol reagent (Invitrogen),

171 following the manufacturer's instructions. N and G gene specific primers were designed based

172 on the available rabies sequences of the Indian isolates (Table 2). G gene was amplified by RT-  
173 PCRs as two overlapping fragments. Two-step RT-PCR was performed using 1µg of total RNA.  
174 Complementary DNA (cDNA) synthesis was done using Superscript Reverse Transcriptase III  
175 enzyme (Invitrogen) per manufacturer's instruction. PCR amplification was done using Platinum  
176 Pfx polymerase (Invitrogen) and thermal cycler profile was as follows: polymerase activation at  
177 94 °C for 5 min; 35 cycles of denaturation at 94 °C for 15 s, annealing at 55 °C for 30 s, and  
178 extension at 68 °C for 1 min; extension at 72 °C for 10 min.

179 **Table 2:** Gene specific primers used for gene amplification and sequencing.  
180

|    | <b>Primers</b> | <b>Sequence (5'-3')</b>  |
|----|----------------|--------------------------|
| 1. | RVN-F          | CGCTGCATTTTRTCARAGT      |
| 2. | RVN-R          | GGAGGGCACCATTGGMTC       |
| 3. | G1- M220-F     | TGGTGTATAACATGRAYTC      |
| 4. | G1- G780-R     | ACCCATGTYCCRTCATAAG      |
| 5. | G2- GH3-F      | GAYTACACCATCTGGATGCC     |
| 6. | G2- SYR-R      | CAAAGGAGAGTTGAGATTGTAGTC |

181

## 182 **Sequencing**

183 Amplified gene segments were purified by QIAquick gel purification kit (Qiagen) per the  
184 manufacturer's instructions. DNA sequencing of the N and G genes were performed using the  
185 Illumina HiSeq2000 platform (Illumina). For 26 isolates of RABV, complete nucleotide  
186 sequencing of nucleoprotein (N) gene (1353 nucleotides) and partial sequencing of glycoprotein  
187 (G) gene (711 nucleotides) was performed.

## 188 **Phylogenetic & evolutionary analysis**

189 Multiple sequence alignment was carried out using MUSCLE [19, 20]. Recombination detection  
190 was carried out using RDP4 [21]. Phylogenetic reconstruction was carried out using both  
191 alignment-based and alignment-free methods. An alignment-based phylogenetic tree was derived



192 using the maximum likelihood (ML) method in the PhyML package [22] with 1000 bootstrap  
193 replicates. An alignment-free method based on Return Time Distribution (RTD) developed in  
194 house was used with k-mer value of 6 to derive trees [23].

195 Molecular clock analysis was carried out using BEAST v1.8.4 [24]. Earlier model selection was  
196 carried out using jModelTest [25] and bat rabies virus was used as an outgroup. Relaxed clock  
197 with lognormal distribution was used for molecular clock analysis with GTR+I+gamma as  
198 substitution model and constant coalescence as demographic model. Markov chain Monte Carlo  
199 (MCMC) algorithm was run for 6 million steps and sampled every 1000 steps. Tracer v1.7 [26]  
200 was used for assessing convergence, and iTOL server was used for visualization of the  
201 phylogenetic trees [27].

## 202 **Results**

### 203 **Phylogenetic and evolutionary analysis based on N gene**

204 Sequencing of complete nucleoprotein gene of 26 Indian isolates (length 1353 nucleotides) was  
205 carried out. Sequence data of 15 isolates were used for further analysis based on removal of in-  
206 frame stop codons and detection of recombination events. Recombination analysis revealed that  
207 four isolates, namely MVC-21, MVC-34, MVC-50 and MVC-53 (GenBank accession numbers  
208 MH258837, MH258840, MH258824 and MH258841, respectively) are potential recombinants as  
209 predicted by three or more methods with p-value < 0.0005 and were hence excluded from  
210 molecular phylogenetic analysis.

211 The 15 nucleoprotein sequences of Indian isolates along with representative RABV sequences  
212 from across the globe (totaling 75 sequences) were used for molecular phylogenetic analysis  
213 (MPA) using both alignment-based and alignment-free methods. Multiple sequence alignment

214 revealed that sequences shared ~81% identity and ~91% similarity. The maximum likelihood  
215 phylogenetic tree showed clustering based on known lineages, namely Arctic-like, Africa 2,  
216 Indian subcontinent, Cosmopolitan and Asian (Fig 1). The mean rate of nucleotide substitution  
217 of N gene nucleotides estimated using by a Bayesian method was  $1.91 \times 10^{-4}$  substitutions/site/yr  
218 (95% highest posterior density (HPD)  $1.05 \times 10^{-4}$  to  $2.78 \times 10^{-4}$ ). Based on the N gene, the  
219 RABV isolates sequenced in this study clustered into two lineages, Arctic-like (13 isolates) and  
220 Indian subcontinent (2 isolates). Tree topology generated using an alignment-free method (Fig 2)  
221 agreed with that of maximum likelihood and Bayesian methods. Arctic-like lineage RABV  
222 isolates reported in this study clustered closely with Arctic-like lineage RABVs from  
223 neighboring countries like Nepal and Afghanistan. The Indian subcontinent lineage RABV  
224 isolates reported in this study clustered with previously reported Indian subcontinent lineage  
225 RABV isolates from India and Sri Lanka.

226 **Fig 1: Maximum likelihood tree based on Nucleoprotein (N) gene.** N gene sequences of 15  
227 Rabies virus (RABV) Indian isolates along with representative RABV sequences from across the  
228 globe (totaling 75 sequences) were used to construct the Maximum likelihood tree using PhyML  
229 with 1000 bootstrap replicates.

230

231 **Fig 2: RTD-based alignment-free phylogenetic tree based on Nucleoprotein (N) gene.**

232 RTD-based alignment-free phylogenetic tree (derived using K-mer = 6) of nucleoprotein (N)  
233 sequences of 15 Rabies virus (RABV) Indian isolates along with representative RABV  
234 sequences from across the globe (totaling 75 sequences).

235

236 **Phylogenetic and evolutionary analysis based on G gene**

237 Partial sequencing of RABV glycoprotein gene (711 nucleotides) was carried out for 26 Indian  
238 isolates. Sequence data of only 21 isolates were used for further analysis based on removal of  
239 sequences containing in-frame stop codons and detection of recombination events.  
240 Recombination event were detected in isolate MVC-50 (GenBank accession number MH258824)  
241 by more than three methods with p-value < 0.0005 and hence was removed from further  
242 phylogenetic analysis.

243 The 21 glycoprotein sequences of Indian isolates along with representative RABV sequences from  
244 across the globe (totaling 57 sequences) were used for molecular phylogenetic analysis using  
245 alignment-based and alignment-free methods. MSA showed ~70% identity and ~84% similarity.  
246 Lineages of the various RABV isolates were estimated using ML method implemented in PhyML  
247 package. The mean rate of nucleotide substitution estimated from the partial glycoprotein  
248 sequences by Bayesian analysis was  $1.32 \times 10^{-3}$  substitutions/site/yr (95% HPD  $6.92 \times 10^{-4}$  to  $2.05$   
249  $\times 10^{-3}$ ).

250 Similar clustering patterns of RABV isolates were observed in the trees generated using  
251 alignment-based (ML, (Fig 3) and Bayesian) and alignment-free (RTD, Figure 4) methods. Of  
252 the Indian RABV isolates, 16 RABV clustered into Arctic-like lineage and 5 clustered into  
253 Indian subcontinent lineage. The phylogenetic trees of the N and G genes (Fig 1, 2, 3 and 4)  
254 displayed similar topologies, indicating the presence of equivalent clades in both trees. For  
255 example, both trees showed Indian subcontinent lineage RABV isolates clustering closely with  
256 other subcontinent Indian subcontinent lineage RABV isolates from Sri Lanka. Notably,  
257 maximum likelihood tree showed that the Arctic like RABV isolates from this study clustered  
258 closely with human RABV isolates from India and Germany.

259 **Fig 3: Maximum likelihood tree based on Glycoprotein (G) gene.** G gene sequences of 21

260 Rabies virus (RABV) Indian isolates along with representative RABV sequences from across the  
261 globe (totaling 57 sequences) were used to construct the Maximum likelihood tree using PhyML  
262 with 1000 bootstrap replicates.

263

264 **Fig 4: RTD-based alignment-free phylogenetic tree based on Glycoprotein (G) gene.** RTD-  
265 based alignment-free phylogenetic tree (derived using K-mer = 6) of glycoprotein sequences of  
266 21 Rabies virus (RABV) Indian isolates along with representative RABV sequences from across  
267 the globe (totaling 57 sequences).

268

269 The time-scaled evolutionary trees obtained using Bayesian analysis (data not shown) based on  
270 both N and G genes indicated that the isolates of Arctic-like lineage diversified more recently  
271 compared to isolates of Indian subcontinent lineage.

## 272 **Discussion**

273 A key aspect of RNA viruses is their exceptionally variable rates of molecular evolution with up  
274 to 6 orders of magnitude in nucleotide substitution rates has been observed among viral species  
275 [28]. Like all RNA viruses, RABVs constantly evolve, and the rate of evolutionary change in  
276 different host species is determined by the nature of virus-host interactions [29]. We investigated  
277 the evolutionary rates of RABV isolates from India using partial sequences of the glycoprotein  
278 (G), the surface protein that allows RABV to enter the cells of nervous system, and the complete  
279 gene sequences of nucleoprotein (N), which forms the viral capsid and plays a role in  
280 transcription and replication.

281 The mean rate of nucleotide substitution estimated from the N gene sequences was  $1.91 \times 10^{-4}$

282 substitutions/site/yr (95% HPD  $1.05 \times 10^{-4}$  to  $2.78 \times 10^{-4}$ ). Interestingly, these estimates are in  
283 close agreement with the reported N-gene mean rate of substitution in RABVs from bats and  
284 terrestrial mammals [30] suggesting that the dog RABVs in India continue to evolve at the same  
285 rate as bat RABVs from around the world. The mean rate of nucleotide substitution estimated  
286 from the partial G gene sequences is  $1.32 \times 10^{-3}$  substitutions/site/yr (95% HPD  $6.92 \times 10^{-4}$  to  
287  $2.05 \times 10^{-3}$ ) which is marginally higher than that reported in a previous study, which evaluated  
288 substitution rate in Indian RABV isolates based on the ecto domain of glycoprotein [13]. Earlier  
289 study using the complete G gene sequences reported the mean rate of substitution to be  
290  $3.9 \times 10^{-4}$  subs per site per year; 95 % HPD values= $1.2-6.5 \times 10^{-4}$  subs per site per year [31]. The  
291 results of this study suggest a higher mean rate of evolutionary change in G gene in Indian dog  
292 RABV isolates as compared to evolutionary rates of lyssaviruses. The observed rate of evolution  
293 could be attributed to use of partial vs full G gene sequences for analysis and the number of  
294 isolates used for estimating the rate of evolution. Therefore, there is a need to re-estimate rate of  
295 substitution of G gene using a higher sample size covering both, Indian and global population of  
296 RABVs.

297 Recombination events have been reported in the polymerase gene of RABV using the complete  
298 genome data [32]. This study reports recombination in both N and G genes of Indian RABV  
299 isolates. Four Indian RABV isolates (MVC-21, MVC-34, MVC-50 and MVC-53) displayed sites  
300 for potential recombination events when analyzed using the N-gene sequences. Interestingly,  
301 MVC-50 was also predicted to be a potential recombinant using the G gene partial sequence.  
302 Homologous recombination is known to occur among rabies viruses which could play a role in  
303 the diversity and evolution of rabies viruses [32]. To more completely understand the role of  
304 recombination in the evolution of Indian isolates of RABV, further studies using complete

305 genome data are required.

306 Molecular phylogenetic analysis of both, N and G genes were performed using alignment-based  
307 and alignment-free methods. The RTD-based alignment-free method is based on frequency of k-  
308 mers and the relative order in which the k-mers occur in the sequences. The method is proved to  
309 be accurate and computationally efficient for analysis of gene and/or genome data as validated  
310 using a variety of human viruses causing NTDs such as Mumps, Rhino, Dengue and West Nile  
311 viruses [33, 34]. Regardless of the method used, the phylogenetic trees constructed using both N  
312 and G genes showed RABV isolates from this study belonged to two distinct lineages namely  
313 Arctic lineage and Indian subcontinent lineage. This finding is in agreement with an earlier study  
314 that showed coexistence of two distinct lineages of RABV in India [13]. An earlier study  
315 reported that RABV isolates tend to form genetic clusters based on the geographical region  
316 within India [35]. However, the present study found that RABV isolates clustered based on  
317 membership to respective lineages rather than geographic proximity. Notably, this study reports  
318 that the RABV isolates belonging to Indian subcontinent lineage clustered closely with the  
319 isolates from Sri Lanka that belong to other subcontinent lineage. This highlights the continued  
320 incursion and/or circulation of the variant subcontinent lineages of RABVs in India that might  
321 have been originated from Sri Lanka. Phylogenetic analysis also revealed that the Arctic like  
322 RABV isolates from this study clustered closely with human RABV isolates from India and  
323 Germany.

324 Complex mechanisms shape the ability of rabies viruses to be maintained within its primary host  
325 species than to be serially transmitted to a new host species [36]. RABV causes lethal infection  
326 in dogs with an infectious period spanning less than 1 week (and typically only 2–4 days) and

327 relies on transmission among members of the same species to be maintained at the population  
328 level [37]. Continued circulation of the two distinct lineages of RABVs in India despite several  
329 vaccination and stray dog population control campaigns suggest that there is a perpetuated  
330 transmission among dogs and enzootic viral establishment of the two distinct lineages among the  
331 dog population.

332 Several studies investigating RABV biology highlighted that RABVs are sensitive to control  
333 measures [38-40]. The maintenance of RABV is suggested to be driven by an interaction  
334 between density-dependent transmissions and rabies-induced mortality [41-43]. However,  
335 alternative mechanisms including demographic structure and spatial structure have recently been  
336 suggested to generate observed epidemic cycles for RABV maintenance in a country [44].

337 Approximately 36% of the world's rabies deaths occur in India each year, most of which take  
338 place when children come into contact with infected dogs. Government of India, is implementing  
339 a "National Rabies Control Program" approved during 12th five year plan (2012-2017) which  
340 aimed to prevent the human deaths due to rabies and to prevent transmission of rabies through  
341 canine (dog) rabies control. Dog population management (DPM) involves improving the health  
342 and well-being of stray or community dogs by vaccination, and reduce dog population size by  
343 routine birth control programs which can facilitate more effective rabies control [45]. Despite  
344 vaccination for many years, there was no downward trend in the RABV incidence in India and  
345 there is continued co-circulation of two distinct lineages as found by this study. Intentional or  
346 unintentional translocation of dogs between different geographical regions could potentially  
347 compromise natural or vaccine-generated barriers [46-49]. As the Indian subcontinent lineage  
348 RABV isolates from Chennai are closely related to viruses from Sri Lanka, this suggests the

349 possibility of regular incursions of RABVs between the two countries. Hence, it is also important  
350 to check the cross-boundary movement of dogs and implement proper quarantine to prevent the  
351 spread of rabies.

## 352 **Acknowledgments**

353 The authors would express their sincere gratitude to Dr. Elankumaran Subbiah (late) who played  
354 a key role in the conception and design of these experiments, who sadly could not be a co-author  
355 of this publication. The authors would also like to acknowledge the access to computational  
356 facilities at the Bioinformatics Centre, SPPU, supported by the Department of Biotechnology,  
357 Govt. of India.

## 358 359 **References**

- 360 1. Baer GM. Rabies--an historical perspective. *Infect Agents Dis.* 1994;3(4):168-80.  
361 PubMed PMID: 7827785.
- 362 2. Belotto A, Leanes LF, Schneider MC, Tamayo H, Correa E. Overview of rabies in the  
363 Americas. *Virus Res.* 2005;111(1):5-12. doi: 10.1016/j.virusres.2005.03.006. PubMed PMID:  
364 15896398.
- 365 3. Fisher CR, Streicker DG, Schnell MJ. The spread and evolution of rabies virus:  
366 conquering new frontiers. *Nat Rev Microbiol.* 2018. doi: 10.1038/nrmicro.2018.11. PubMed  
367 PMID: 29479072.
- 368 4. WHO. WHO Expert Consultation on Rabies. World Health Organization, 1-139  
369 2013.
- 370 5. Bourhy H, Kissi B, Tordo N. Taxonomy and evolutionary studies on lyssaviruses with  
371 special reference to Africa. *Onderstepoort J Vet Res.* 1993;60(4):277-82. PubMed PMID:  
372 7777311.
- 373 6. Dacheux L, Delmas O, Bourhy H. Human rabies encephalitis prevention and treatment:  
374 progress since Pasteur's discovery. *Infect Disord Drug Targets.* 2011;11(3):251-99. PubMed  
375 PMID: 21488832.



- 376 7. Nel LH, Markotter W. Lyssaviruses. *Crit Rev Microbiol.* 2007;33(4):301-24. doi:  
377 10.1080/10408410701647602. PubMed PMID: 18033596.
- 378 8. Nel LH, Rupprecht CE. Emergence of lyssaviruses in the Old World: the case of Africa.  
379 *Curr Top Microbiol Immunol.* 2007;315:161-93. PubMed PMID: 17848065.
- 380 9. Knobel DL, Cleaveland S, Coleman PG, Fevre EM, Meltzer MI, Miranda ME, et al. Re-  
381 evaluating the burden of rabies in Africa and Asia. *Bull World Health Organ.* 2005;83(5):360-8.  
382 doi: /S0042-96862005000500012. PubMed PMID: 15976877; PubMed Central PMCID:  
383 PMCPMC2626230.
- 384 10. Nel LH, Taylor LH, Balaram D, Doyle KA. Global partnerships are critical to advance  
385 the control of Neglected Zoonotic Diseases: The case of the Global Alliance for Rabies Control.  
386 *Acta Trop.* 2017;165:274-9. doi: 10.1016/j.actatropica.2015.10.014. PubMed PMID: 26519885.
- 387 11. Sudarshan MK, Madhusudana SN, Mahendra BJ, Rao NS, Ashwath Narayana DH, Abdul  
388 Rahman S, et al. Assessing the burden of human rabies in India: results of a national multi-center  
389 epidemiological survey. *Int J Infect Dis.* 2007;11(1):29-35. doi: 10.1016/j.ijid.2005.10.007.  
390 PubMed PMID: 16678463.
- 391 12. Reddy GB, Singh R, Singh RP, Singh KP, Gupta PK, Mahadevan A, et al. Molecular  
392 characterization of Indian rabies virus isolates by partial sequencing of nucleoprotein (N) and  
393 phosphoprotein (P) genes. *Virus Genes.* 2011;43(1):13-7. doi: 10.1007/s11262-011-0601-0.  
394 PubMed PMID: 21452061.
- 395 13. Reddy RV, Mohana Subramanian B, Surendra KS, Babu RP, Rana SK, Manjari KS, et al.  
396 Rabies virus isolates of India - simultaneous existence of two distinct evolutionary lineages.  
397 *Infect Genet Evol.* 2014;27:163-72. doi: 10.1016/j.meegid.2014.07.014. PubMed PMID:  
398 25077994.
- 399 14. Cherian S, Singh R, Singh KP, Manjunatha Reddy GB, Anjaneya, Ravi Kumar G, et al.  
400 Phylogenetic analysis of Indian rabies virus isolates targeting the complete glycoprotein gene.  
401 *Infect Genet Evol.* 2015;36:333-8. doi: 10.1016/j.meegid.2015.09.024. PubMed PMID:  
402 26427850.
- 403 15. Nadin-Davis SA, Turner G, Paul JP, Madhusudana SN, Wandeler AI. Emergence of  
404 Arctic-like rabies lineage in India. *Emerg Infect Dis.* 2007;13(1):111-6. doi:  
405 10.3201/eid1301.060702. PubMed PMID: 17370523; PubMed Central PMCID:  
406 PMCPMC2725804.
- 407 16. Nadin-Davis SA, Casey GA, Wandeler AI. A molecular epidemiological study of rabies  
408 virus in central Ontario and western Quebec. *J Gen Virol.* 1994;75 ( Pt 10):2575-83. doi:  
409 10.1099/0022-1317-75-10-2575. PubMed PMID: 7931145.
- 410 17. Dean S. Rabies and quarantine. *Vet Rec.* 1996;139(22):551. PubMed PMID: 8961527.
- 411 18. Aravindh Babu RP, Manoharan S, Ramadass P, Chandran ND. Evaluation of rt-PCR  
412 assay for routine laboratory diagnosis of rabies in post mortem brain samples from different

- 413 species of animals. *Indian J Virol.* 2012;23(3):392-6. doi: 10.1007/s13337-012-0109-9. PubMed  
414 PMID: 24293832; PubMed Central PMCID: PMCPMC3550798.
- 415 19. Edgar RC. MUSCLE: a multiple sequence alignment method with reduced time and  
416 space complexity. *BMC Bioinformatics.* 2004;5:113. doi: 10.1186/1471-2105-5-113. PubMed  
417 PMID: 15318951; PubMed Central PMCID: PMCPMC517706.
- 418 20. Edgar RC. MUSCLE: multiple sequence alignment with high accuracy and high  
419 throughput. *Nucleic Acids Res.* 2004;32(5):1792-7. doi: 10.1093/nar/gkh340. PubMed PMID:  
420 15034147; PubMed Central PMCID: PMCPMC390337.
- 421 21. Martin DP, Williamson C, Posada D. RDP2: recombination detection and analysis from  
422 sequence alignments. *Bioinformatics.* 2005;21(2):260-2. doi: 10.1093/bioinformatics/bth490.  
423 PubMed PMID: 15377507.
- 424 22. Guindon S, Gascuel O. A simple, fast, and accurate algorithm to estimate large  
425 phylogenies by maximum likelihood. *Syst Biol.* 2003;52(5):696-704. PubMed PMID: 14530136.
- 426 23. Kolekar P, Kale M, Kulkarni-Kale U. Alignment-free distance measure based on return  
427 time distribution for sequence analysis: applications to clustering, molecular phylogeny and  
428 subtyping. *Mol Phylogenet Evol.* 2012;65(2):510-22. doi: 10.1016/j.ympev.2012.07.003.  
429 PubMed PMID: 22820020.
- 430 24. Drummond AJ, Suchard MA, Xie D, Rambaut A. Bayesian phylogenetics with BEAUti  
431 and the BEAST 1.7. *Mol Biol Evol.* 2012;29(8):1969-73. doi: 10.1093/molbev/mss075. PubMed  
432 PMID: 22367748; PubMed Central PMCID: PMCPMC3408070.
- 433 25. Posada D. jModelTest: phylogenetic model averaging. *Mol Biol Evol.* 2008;25(7):1253-  
434 6. doi: 10.1093/molbev/msn083. PubMed PMID: 18397919.
- 435 26. Rambaut A DA, Xie D, Baele G & Suchard MA. Tracer v1.7, Available from  
436 <http://tree.bio.ed.ac.uk/software/tracer/>. 2018.
- 437 27. Letunic I, Bork P. Interactive tree of life (iTOL) v3: an online tool for the display and  
438 annotation of phylogenetic and other trees. *Nucleic Acids Res.* 2016;44(W1):W242-5. doi:  
439 10.1093/nar/gkw290. PubMed PMID: 27095192; PubMed Central PMCID: PMCPMC4987883.
- 440 28. Duffy S, Shackelton LA, Holmes EC. Rates of evolutionary change in viruses: patterns  
441 and determinants. *Nat Rev Genet.* 2008;9(4):267-76. doi: 10.1038/nrg2323. PubMed PMID:  
442 18319742.
- 443 29. Troupin C, Dacheux L, Tanguy M, Sabeta C, Blanc H, Bouchier C, et al. Large-Scale  
444 Phylogenomic Analysis Reveals the Complex Evolutionary History of Rabies Virus in Multiple  
445 Carnivore Hosts. *PLoS Pathog.* 2016;12(12):e1006041. doi: 10.1371/journal.ppat.1006041.  
446 PubMed PMID: 27977811; PubMed Central PMCID: PMCPMC5158080.

- 447 30. Davis PL, Bourhy H, Holmes EC. The evolutionary history and dynamics of bat rabies  
448 virus. *Infect Genet Evol.* 2006;6(6):464-73. doi: 10.1016/j.meegid.2006.02.007. PubMed PMID:  
449 16621724.
- 450 31. Bourhy H, Reynes JM, Dunham EJ, Dacheux L, Larrous F, Huong VT, et al. The origin  
451 and phylogeography of dog rabies virus. *J Gen Virol.* 2008;89(Pt 11):2673-81. doi:  
452 10.1099/vir.0.2008/003913-0. PubMed PMID: 18931062; PubMed Central PMCID:  
453 PMCPMC3326349.
- 454 32. Liu W, Liu Y, Liu J, Zhai J, Xie Y. Evidence for inter- and intra-clade recombinations in  
455 rabies virus. *Infect Genet Evol.* 2011;11(8):1906-12. doi: 10.1016/j.meegid.2011.08.031.  
456 PubMed PMID: 22041506.
- 457 33. Kolekar P, Hake N, Kale M, Kulkarni-Kale U. WNV Typer: a server for genotyping of  
458 West Nile viruses using an alignment-free method based on a return time distribution. *J Virol*  
459 *Methods.* 2014;198:41-55. doi: 10.1016/j.jviromet.2013.12.012. PubMed PMID: 24388930.
- 460 34. Kolekar P, Pataskar A, Kulkarni-Kale U, Pal J, Kulkarni A. IRESPred: Web Server for  
461 Prediction of Cellular and Viral Internal Ribosome Entry Site (IRES). *Sci Rep.* 2016;6:27436.  
462 doi: 10.1038/srep27436. PubMed PMID: 27264539; PubMed Central PMCID:  
463 PMCPMC4893748.
- 464 35. Nagarajan T, Mohanasubramanian B, Seshagiri EV, Nagendrakumar SB, Saseendranath  
465 MR, Satyanarayana ML, et al. Molecular epidemiology of rabies virus isolates in India. *J Clin*  
466 *Microbiol.* 2006;44(9):3218-24. doi: 10.1128/JCM.00801-06. PubMed PMID: 16954251;  
467 PubMed Central PMCID: PMCPMC1594703.
- 468 36. Childs JE, Richt JA, Mackenzie JS. Introduction: conceptualizing and partitioning the  
469 emergence process of zoonotic viruses from wildlife to humans. *Curr Top Microbiol Immunol.*  
470 2007;315:1-31. PubMed PMID: 17848058.
- 471 37. Fisher CR, Streicker DG, Schnell MJ. The spread and evolution of rabies virus:  
472 conquering new frontiers. *Nat Rev Microbiol.* 2018;16(4):241-55. doi: 10.1038/nrmicro.2018.11.  
473 PubMed PMID: 29479072.
- 474 38. Biek R, Henderson JC, Waller LA, Rupprecht CE, Real LA. A high-resolution genetic  
475 signature of demographic and spatial expansion in epizootic rabies virus. *Proc Natl Acad Sci U S*  
476 *A.* 2007;104(19):7993-8. doi: 10.1073/pnas.0700741104. PubMed PMID: 17470818; PubMed  
477 Central PMCID: PMCPMC1876560.
- 478 39. Hampson K, Dushoff J, Cleaveland S, Haydon DT, Kaare M, Packer C, et al.  
479 Transmission dynamics and prospects for the elimination of canine rabies. *PLoS Biol.*  
480 2009;7(3):e53. doi: 10.1371/journal.pbio.1000053. PubMed PMID: 19278295; PubMed Central  
481 PMCID: PMCPMC2653555.
- 482 40. Blackwood JC, Streicker DG, Altizer S, Rohani P. Resolving the roles of immunity,  
483 pathogenesis, and immigration for rabies persistence in vampire bats. *Proc Natl Acad Sci U S A.*

- 484 2013;110(51):20837-42. doi: 10.1073/pnas.1308817110. PubMed PMID: 24297874; PubMed  
485 Central PMCID: PMCPMC3870737.
- 486 41. Anderson RM, Jackson HC, May RM, Smith AM. Population dynamics of fox rabies in  
487 Europe. *Nature*. 1981;289(5800):765-71. PubMed PMID: 7464941.
- 488 42. Childs JE, Curns AT, Dey ME, Real LA, Feinstein L, Bjornstad ON, et al. Predicting the  
489 local dynamics of epizootic rabies among raccoons in the United States. *Proc Natl Acad Sci U S*  
490 *A*. 2000;97(25):13666-71. doi: 10.1073/pnas.240326697. PubMed PMID: 11069300; PubMed  
491 Central PMCID: PMCPMC17633.
- 492 43. Courtin F, Carpenter TE, Paskin RD, Chomel BB. Temporal patterns of domestic and  
493 wildlife rabies in central Namibia stock-ranching area, 1986-1996. *Prev Vet Med*.  
494 2000;43(1):13-28. PubMed PMID: 10665948.
- 495 44. Morters MK, Restif O, Hampson K, Cleaveland S, Wood JL, Conlan AJ. Evidence-based  
496 control of canine rabies: a critical review of population density reduction. *J Anim Ecol*.  
497 2013;82(1):6-14. doi: 10.1111/j.1365-2656.2012.02033.x. PubMed PMID: 23004351; PubMed  
498 Central PMCID: PMCPMC3579231.
- 499 45. Taylor LH, Wallace RM, Balaram D, Lindenmayer JM, Eckery DC, Mutonono-Watkiss  
500 B, et al. The Role of Dog Population Management in Rabies Elimination-A Review of Current  
501 Approaches and Future Opportunities. *Front Vet Sci*. 2017;4:109. doi:  
502 10.3389/fvets.2017.00109. PubMed PMID: 28740850; PubMed Central PMCID:  
503 PMCPMC5502273.
- 504 46. Talbi C, Lemey P, Suchard MA, Abdelatif E, Elharrak M, Nourlil J, et al. Phylodynamics  
505 and human-mediated dispersal of a zoonotic virus. *PLoS Pathog*. 2010;6(10):e1001166. doi:  
506 10.1371/journal.ppat.1001166. PubMed PMID: 21060816; PubMed Central PMCID:  
507 PMCPMC2965766.
- 508 47. Nettles VF, Shaddock JH, Sikes RK, Reyes CR. Rabies in translocated raccoons. *Am J*  
509 *Public Health*. 1979;69(6):601-2. PubMed PMID: 443502; PubMed Central PMCID:  
510 PMCPMC1618975.
- 511 48. Smith DL, Lucey B, Waller LA, Childs JE, Real LA. Predicting the spatial dynamics of  
512 rabies epidemics on heterogeneous landscapes. *Proc Natl Acad Sci U S A*. 2002;99(6):3668-72.  
513 doi: 10.1073/pnas.042400799. PubMed PMID: 11904426; PubMed Central PMCID:  
514 PMCPMC122581.
- 515 49. Horton DL, McElhinney LM, Freuling CM, Marston DA, Banyard AC, Goharriz H, et  
516 al. Complex epidemiology of a zoonotic disease in a culturally diverse region: phylogeography  
517 of rabies virus in the Middle East. *PLoS Negl Trop Dis*. 2015;9(3):e0003569. doi:  
518 10.1371/journal.pntd.0003569. PubMed PMID: 25811659; PubMed Central PMCID:  
519 PMCPMC4374968.

520



Tree scale: 0.01

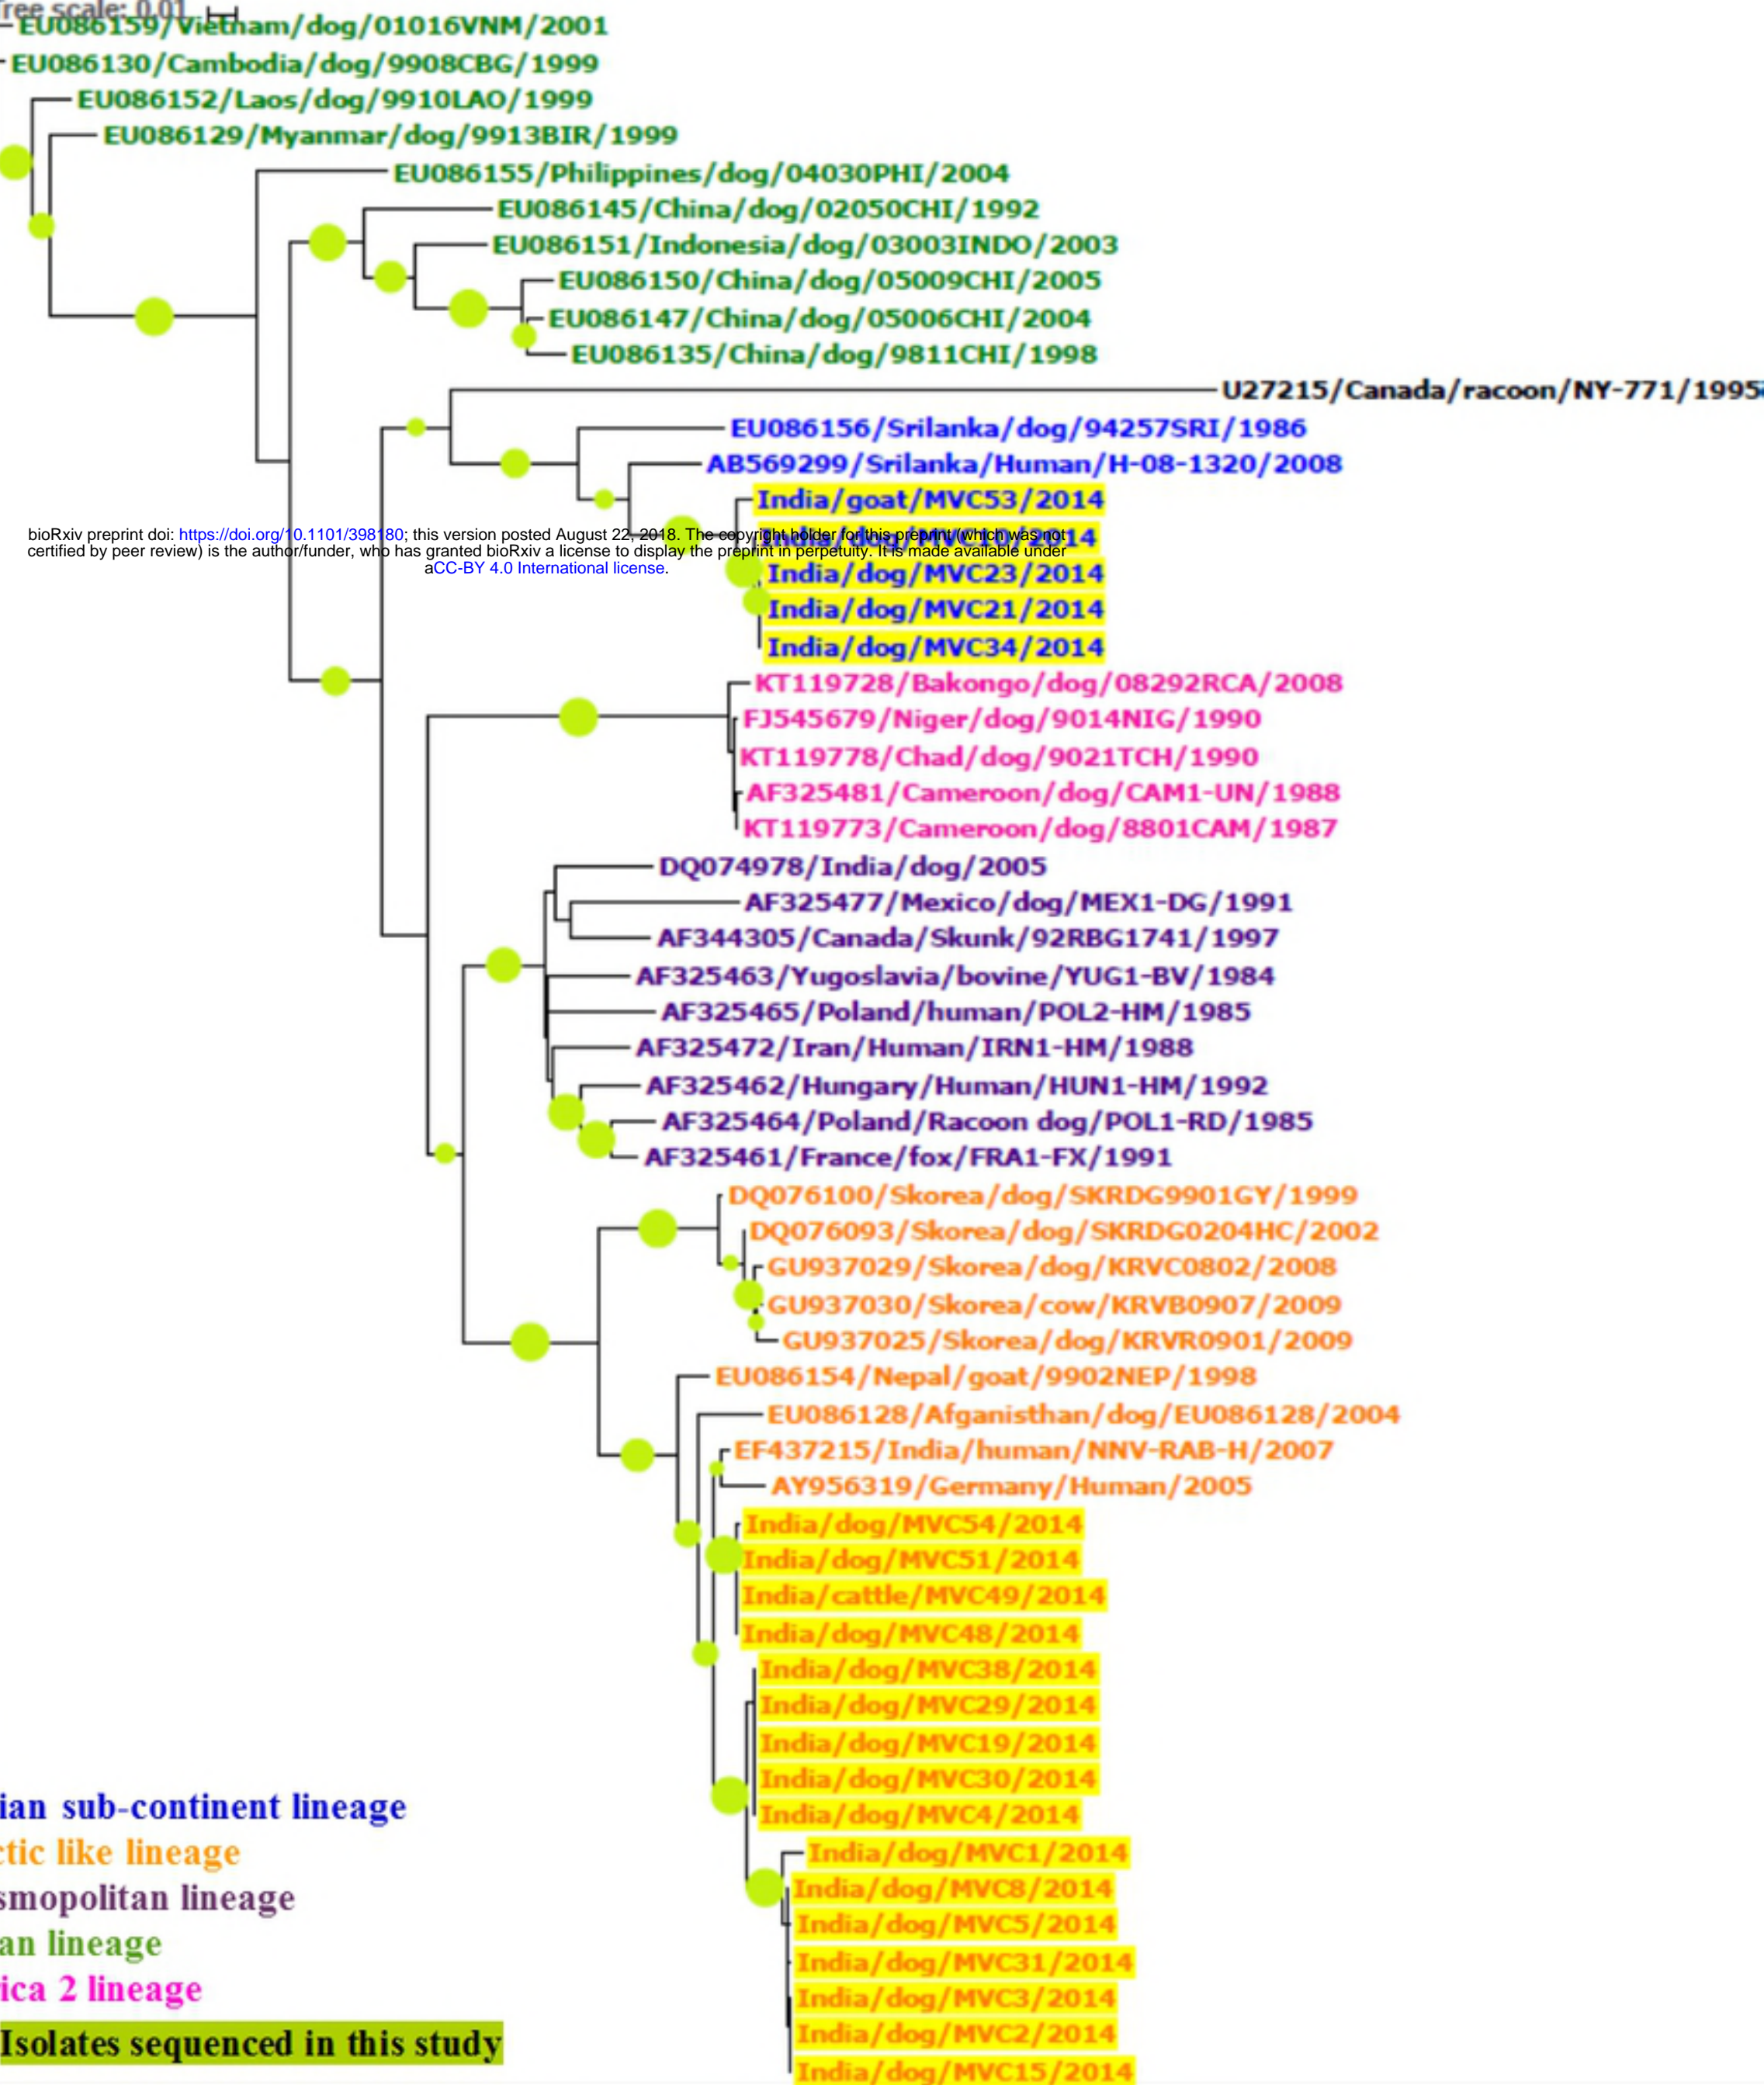

Indian sub-continent lineage

Arctic like lineage

Cosmopolitan lineage

Asian lineage

Africa 2 lineage

Isolates sequenced in this study



tree scale: 0.01

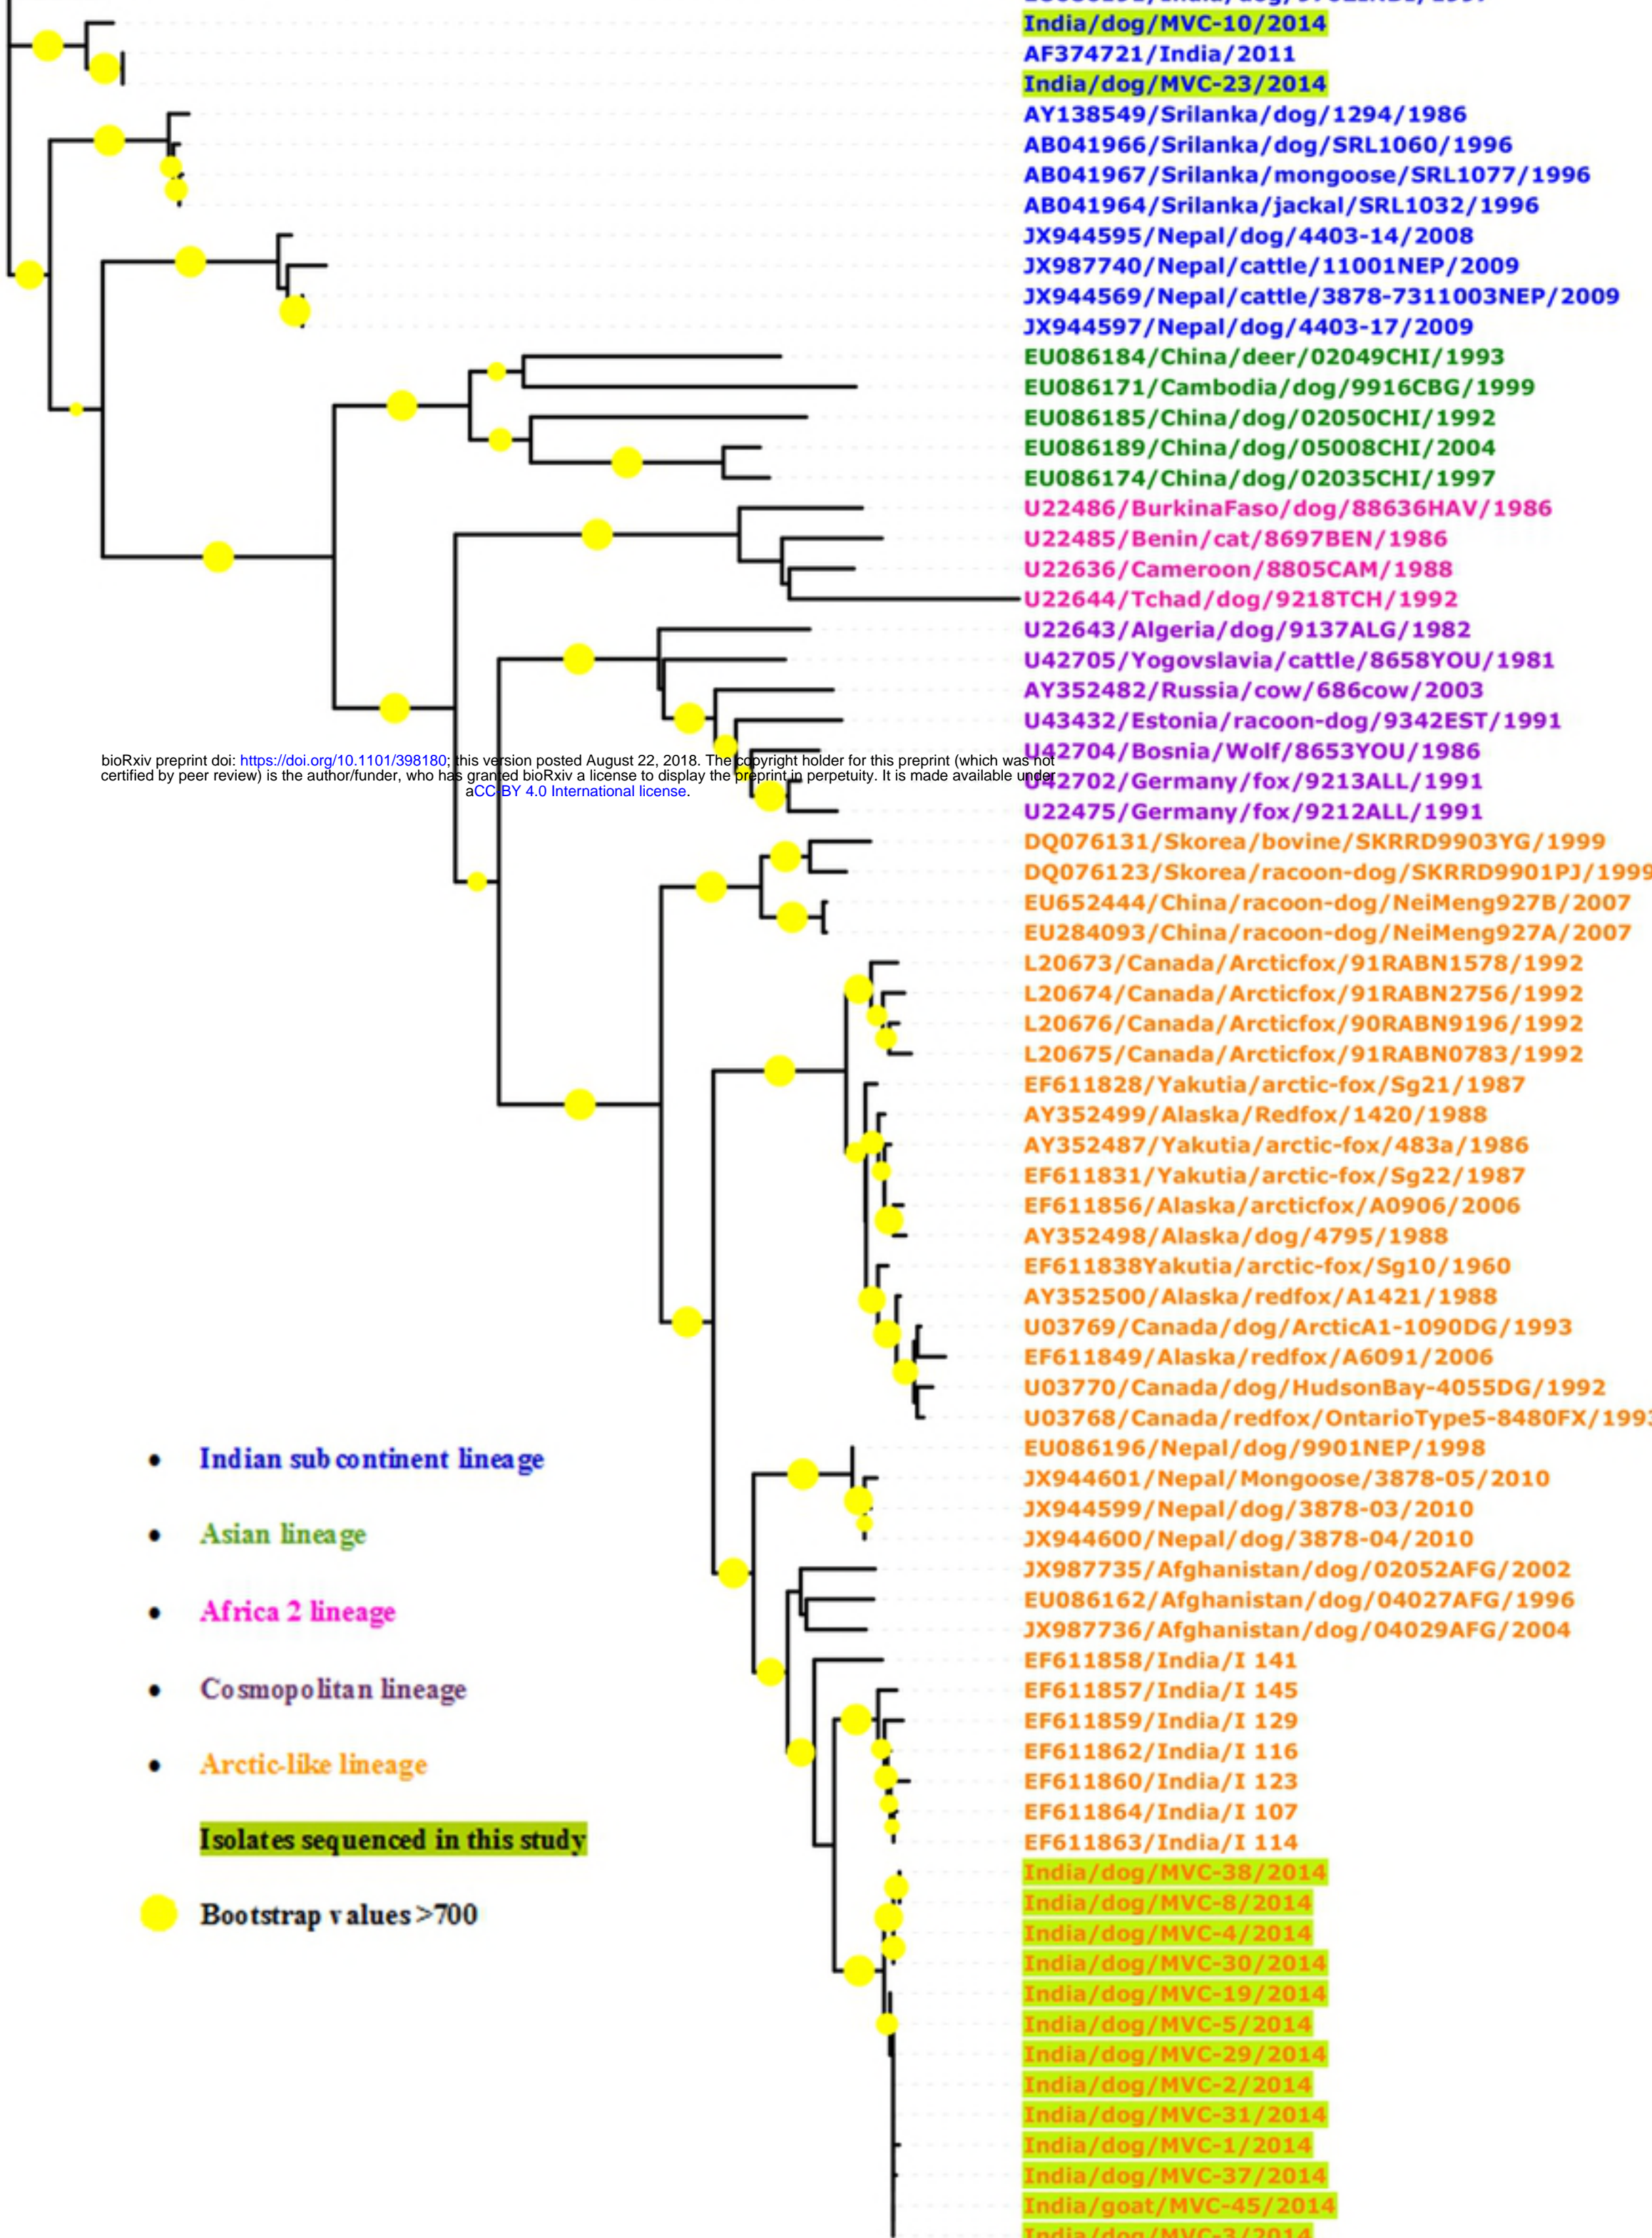

bioRxiv preprint doi: <https://doi.org/10.1101/398180>; this version posted August 22, 2018. The copyright holder for this preprint (which was not certified by peer review) is the author/funder, who has granted bioRxiv a license to display the preprint in perpetuity. It is made available under aCC-BY 4.0 International license.

- Indian sub continent lineage
- Asian lineage
- Africa 2 lineage
- Cosmopolitan lineage
- Arctic-like lineage
- Isolates sequenced in this study
- Bootstrap values >700

EU086191/India/dog/9702INDI/1997  
 India/dog/MVC-10/2014  
 AF374721/India/2011  
 India/dog/MVC-23/2014  
 AY138549/Srilanka/dog/1294/1986  
 AB041966/Srilanka/dog/SRL1060/1996  
 AB041967/Srilanka/mongoose/SRL1077/1996  
 AB041964/Srilanka/jackal/SRL1032/1996  
 JX944595/Nepal/dog/4403-14/2008  
 JX987740/Nepal/cattle/11001NEP/2009  
 JX944569/Nepal/cattle/3878-7311003NEP/2009  
 JX944597/Nepal/dog/4403-17/2009  
 EU086184/China/deer/02049CHI/1993  
 EU086171/Cambodia/dog/9916CBG/1999  
 EU086185/China/dog/02050CHI/1992  
 EU086189/China/dog/05008CHI/2004  
 EU086174/China/dog/02035CHI/1997  
 U22486/BurkinaFaso/dog/88636HAV/1986  
 U22485/Benin/cat/8697BEN/1986  
 U22636/Cameroon/8805CAM/1988  
 U22644/Tchad/dog/9218TCH/1992  
 U22643/Algeria/dog/9137ALG/1982  
 U42705/Yogovslavia/cattle/8658YOU/1981  
 AY352482/Russia/cow/686cow/2003  
 U43432/Estonia/racoon-dog/9342EST/1991  
 U42704/Bosnia/Wolf/8653YOU/1986  
 U42702/Germany/fox/9213ALL/1991  
 U22475/Germany/fox/9212ALL/1991  
 DQ076131/Skorea/bovine/SKRRD9903YG/1999  
 DQ076123/Skorea/racoon-dog/SKRRD9901PJ/1999  
 EU652444/China/racoon-dog/NeiMeng927B/2007  
 EU284093/China/racoon-dog/NeiMeng927A/2007  
 L20673/Canada/Arcticfox/91RABN1578/1992  
 L20674/Canada/Arcticfox/91RABN2756/1992  
 L20676/Canada/Arcticfox/90RABN9196/1992  
 L20675/Canada/Arcticfox/91RABN0783/1992  
 EF611828/Yakutia/arctic-fox/Sg21/1987  
 AY352499/Alaska/Redfox/1420/1988  
 AY352487/Yakutia/arctic-fox/483a/1986  
 EF611831/Yakutia/arctic-fox/Sg22/1987  
 EF611856/Alaska/arcticfox/A0906/2006  
 AY352498/Alaska/dog/4795/1988  
 EF611838Yakutia/arctic-fox/Sg10/1960  
 AY352500/Alaska/redfox/A1421/1988  
 U03769/Canada/dog/ArcticA1-1090DG/1993  
 EF611849/Alaska/redfox/A6091/2006  
 U03770/Canada/dog/HudsonBay-4055DG/1992  
 U03768/Canada/redfox/OntarioType5-8480FX/1993  
 EU086196/Nepal/dog/9901NEP/1998  
 JX944601/Nepal/Mongoose/3878-05/2010  
 JX944599/Nepal/dog/3878-03/2010  
 JX944600/Nepal/dog/3878-04/2010  
 JX987735/Afghanistan/dog/02052AFG/2002  
 EU086162/Afghanistan/dog/04027AFG/1996  
 JX987736/Afghanistan/dog/04029AFG/2004  
 EF611858/India/I 141  
 EF611857/India/I 145  
 EF611859/India/I 129  
 EF611862/India/I 116  
 EF611860/India/I 123  
 EF611864/India/I 107  
 EF611863/India/I 114  
 India/dog/MVC-38/2014  
 India/dog/MVC-8/2014  
 India/dog/MVC-4/2014  
 India/dog/MVC-30/2014  
 India/dog/MVC-19/2014  
 India/dog/MVC-5/2014  
 India/dog/MVC-29/2014  
 India/dog/MVC-2/2014  
 India/dog/MVC-31/2014  
 India/dog/MVC-1/2014  
 India/dog/MVC-37/2014  
 India/goat/MVC-45/2014  
 India/dog/MVC-3/2014
